# Supplementary material for: Characterization of Key Odorants in Lingtou Dancong Oolong Tea and Their Differences Induced by Environmental Conditions from Different Altitudes
Source: MDPI journal article supplement (doi:10.3390/metabo12111063), 2022-11-03
Supplement: s1 [file s1]

## Supplementary Materials

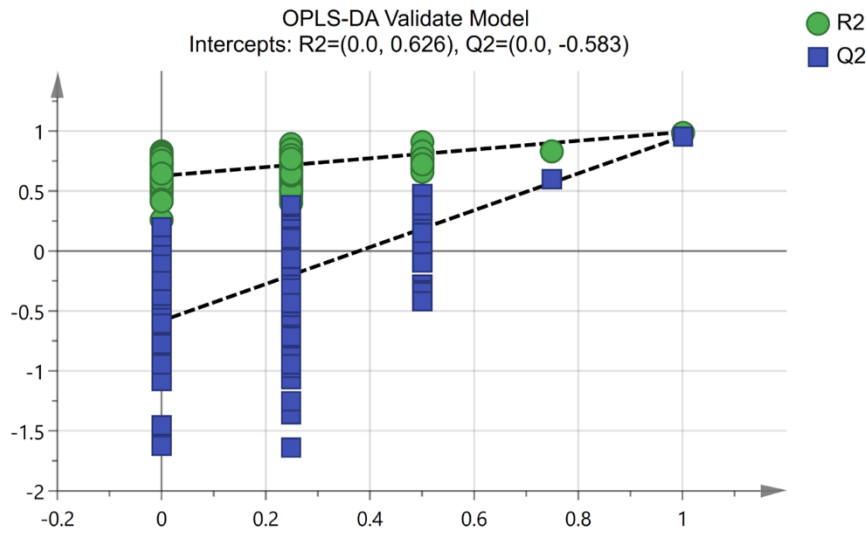

**Figure S1.** OPLS-DA model validation

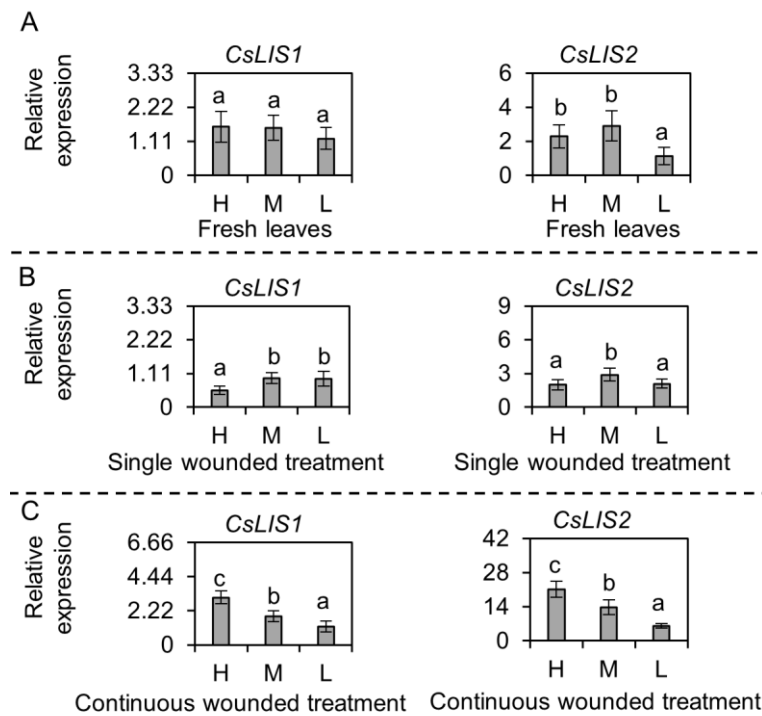

**Figure S2.** Expression level of *CsLISs* in fresh leaves and wounded leaves of Lingtou Dancong grown at different altitudes. (A) Expression levels of *CsLIS1* and *CsLIS2* in fresh leaves (*CsSAND* as reference gene); (B) Expression levels of *CsLIS1* and *CsLIS2* in leaves after single wounded treatment for 3 hours (*CsSAND* as reference gene); (C) Expression levels of *CsLIS1* and *CsLIS2* in leaves after continuous wounded treatment for 3 hours (*CsSAND* as reference gene). *LIS*, linalool synthase. Data are expressed as mean  $\pm$  S. D. (n=3). Means distinguished with different letters are significantly different from each

other among high altitude, medium altitude and low altitude ( $p \leq 0.05$ ). H, M and L represents the *C. sinensis* cv. Lingtou Dancong leaves picked from high, medium and low altitude respectively.

**Table S1.** Threshold information.

| NO | Odorants                                 | OT<br>( $\mu\text{g/kg}$ ) | References |
|----|------------------------------------------|----------------------------|------------|
| 1  | Butanal, 2-methyl-                       | 1                          | [1]        |
| 2  | Hexanal                                  | 4.5                        | [2]        |
| 3  | Ethyl 2-methyl butyrate                  | n.f.                       |            |
| 4  | 2-Heptanone                              | 140                        | [2]        |
| 5  | Heptanal                                 | 550                        | [2]        |
| 6  | (Z)-4-Heptenal                           | 10                         | [2]        |
| 7  | 2,5-Dimethyl pyrazine                    | n.f.                       |            |
| 8  | Diethyl disulfide                        | 30                         | [3]        |
| 9  | Dimethyl trisulfide                      | 0.01                       | [4]        |
| 10 | 1-Octen-3-ol                             | 1.5                        | [2]        |
| 11 | Methyl heptenone                         | 100                        | [5]        |
| 12 | $\beta$ -Myrcene                         | 14                         | [6]        |
| 13 | 2-Pentyl furan                           | 5.9                        | [2]        |
| 14 | $\alpha$ -Phellandrene                   | n.f.                       |            |
| 15 | (Z)- $\beta$ -Ocimene                    | 34                         | [7]        |
| 16 | 1-Ethyl-1H-pyrrole-2-carbaldehyde        | 37                         | [8]        |
| 17 | (E)-2-Octenal                            | 3                          | [2]        |
| 18 | $\gamma$ -Terpinene                      | 55                         | [8]        |
| 19 | 3-Ethyl-2,5-dimethylpyrazine             | 8.6                        | [8]        |
| 20 | Pyrazine, 2,6-diethyl-                   | n.f.                       |            |
| 21 | Linalool                                 | 0.22                       | [9]        |
| 22 | Nonanal                                  | 40                         | [2]        |
| 23 | Hotrienol                                | 110                        | [2]        |
| 24 | 2,6-Dimethyl-1,3,5,7-octatetraene, E, E- | n.f.                       |            |
| 25 | 5-Ethyl-6-methyl-3E-hepten-2-one         | n.f.                       |            |
| 26 | Nerol oxide                              | n.f.                       |            |
| 27 | <i>trans</i> -Linalool oxide (pyranoid)  | 320                        | [2]        |
| 28 | Terpinen-4-ol                            | 4370                       | [10]       |
| 29 | $\alpha$ -Terpineol                      | 330                        | [2]        |
| 30 | Methyl salicylate                        | 40                         | [2]        |
| 31 | (E, E)-2,4-Nonadienal                    | 0.06                       | [11]       |
| 32 | Nerol                                    | 300                        | [11]       |
| 33 | <i>cis</i> -Citral                       | 30                         | [6]        |

|    |                                        |       |      |
|----|----------------------------------------|-------|------|
| 34 | Geraniol                               | 40    | [2]  |
| 35 | $\gamma$ -Octanolactone                | n.f.  |      |
| 36 | 2-Phenyl-2-butenal                     | 500   | [10] |
| 37 | 2,4-Decadienal                         | n.f.  |      |
| 38 | Indole                                 | 100   | [2]  |
| 39 | Theaspirane B                          | n.f.  |      |
| 40 | ( <i>E</i> )-Methyl geranate           | n.f.  |      |
| 41 | 1,2-Dihydro-1,1,6-trimethylnaphthalene | n.f.  |      |
| 42 | $\gamma$ -Nonanolactone                | 27    | 4    |
| 43 | ( <i>E</i> )- $\beta$ -Damascenone     | 0.05  | [7]  |
| 44 | ( <i>Z</i> )-Jasmone                   | 21600 | [5]  |
| 45 | Dehydrodihydroionone                   | n.f.  |      |
| 46 | $\alpha$ -Ionone                       | 76    | [12] |
| 47 | Isoeugenol                             | n.f.  |      |
| 48 | $\gamma$ -Decanolactone                | n.f.  |      |
| 49 | trans- $\beta$ -Ionone                 | 7     | [2]  |
| 50 | <i>cis</i> -Jasmine lactone            | 7     | [10] |
| 51 | $\delta$ -Dodecalactone                | n.f.  |      |
| 52 | Dihydroactinidioide                    | 500   | [13] |
| 53 | ( <i>E</i> )-Nerolidol                 | 10    | [14] |
| 54 | Hexyl benzoate                         | 73    | [10] |
| 55 | Caryophyllene oxide                    | n.f.  |      |
| 56 | Methyl jasmonate                       | 3     | [10] |
| 57 | $\alpha$ -Cadinol                      | n.f.  |      |
| 58 | Bisabolol Oxide B                      | n.f.  |      |
| 59 | <i>cis</i> -3-Hexenyl salicylate       | 115   | [10] |

OT, odor thresholds in water. The thresholds information and references in Table 1 are listed above.  
n.f., represents not found.

**Table S2.** The primers used for quantitative real time PCR (qRT-PCR) in the study.

| Gene                             | Accession number | Forward primer 5'-3'    | Reverse primer 5'-3'      |
|----------------------------------|------------------|-------------------------|---------------------------|
| <i>CsEF-1<math>\alpha</math></i> | KA280301.1       | TTGGACAAGCTCAAGGCTGAACG | ATGGCCAGGAGCATCAAT GACAGT |
| <i>CsSAND1</i>                   | KM057790         | TGAGTAACTCTGGCAAACCAATA | CCCATTCTCCACGAAGGAAA      |
| <i>CsLIS1</i>                    | KF006849         | GAGGGTTGATGAGTTTGTATG   | TCACTTGGGTTCGTGTAAT       |
| <i>CsLIS2</i>                    | KR873396         | TTCAAGGACAAGGACGGAGGG   | CCATGAACTTTGCCAGGCTCT     |

*EF-1 $\alpha$* , encoding elongation factor 1; *SAND*, *SAND* family protein; *LIS*, linalool synthase.

**Table S3.** Detailed information of Lingtou Dancong tea product at high altitude.

| NO | Odorants                | CAS       | Description                                           | RT (left) | RT (right) | Aroma Intensities (high altitude) |    |    |    |    |    |
|----|-------------------------|-----------|-------------------------------------------------------|-----------|------------|-----------------------------------|----|----|----|----|----|
|    |                         |           |                                                       |           |            | P1                                | P2 | P3 | P4 | P5 | P6 |
| 1  | Butanal, 2-methyl-      | 96-17-3   | Musty cocoa coffee nutty                              | 4.19      | 4.53       | 2                                 |    |    | 2  | 1  |    |
| 2  | Hexanal                 | 66-25-1   | fresh green fatty aldehydic grass leafy fruity sweaty | 6.75      | 6.85       | 2                                 | 3  |    | 2  | 2  |    |
| 3  | Ethyl 2-methyl butyrate | 7452-79-1 | sharp sweet green apple fruity                        | 8.02      | 8.32       | 3                                 | 3  |    | 1  | 3  | 1  |
| 4  | 2-Heptanone             | 110-43-0  | fruity spicy sweet herbal coconut woody               | 9.32      | 9.57       | 2                                 |    |    |    | 1  |    |
| 5  | Heptanal                | 111-71-7  | fresh aldehydic fatty green herbal wine-lee ozone     | 9.65      | 9.80       | 3                                 | 3  | 1  | 4  | 2  | 1  |
| 6  | (Z)-4-Heptenal          | 6728-31-0 | fresh aldehydic fatty green herbal wine-lee ozone     | 9.65      | 9.80       | 3                                 | 3  | 1  | 4  | 2  | 1  |

|    |                                       |            |                                                             |       |       |   |   |   |   |   |   |
|----|---------------------------------------|------------|-------------------------------------------------------------|-------|-------|---|---|---|---|---|---|
| 7  | 2,5-Dimethyl pyrazine                 | 123-32-0   | peanut butter musty nutty woody<br>roasted cocoa            | 9.92  | 10.18 | 2 | 3 |   |   | 2 |   |
| 8  | Diethyl disulfide                     | 110-81-6   | gassy ripe onion greasy garlic                              | 10.30 | 10.50 |   | 3 |   | 3 | 2 | 2 |
| 9  | Dimethyl trisulfide                   | 3658-80-8  | sulfurous cooked onion savory<br>meaty                      | 12.00 | 12.20 | 2 | 3 |   | 4 | 3 | 2 |
| 10 | 1-Octen-3-ol                          | 3391-86-4  | mushroom earthy green oily fungal<br>raw chicken            | 12.20 | 12.40 |   |   |   | 2 | 4 | 2 |
| 11 | Methyl heptenone                      | 110-93-0   | citrus green musty lemongrass apple                         | 12.40 | 12.60 |   |   |   | 2 | 4 | 2 |
| 12 | $\beta$ -Myrcene                      | 123-35-3   | Peppery terpene spicy balsam plastic                        | 12.60 | 12.70 | 3 | 3 | 1 | 4 | 4 | 2 |
| 13 | 2-Pentyl furan                        | 3777-69-3  | Fruity green earthy beany vegetable<br>metallic             | 12.60 | 12.70 | 3 | 3 | 1 | 4 | 4 | 2 |
| 14 | $\alpha$ -Phellandrene                | 99-83-2    | citrus herbal terpene green woody<br>peppery                | 13.10 | 13.42 | 3 |   | 3 |   |   | 2 |
| 15 | (Z)- $\beta$ -Ocimene                 | 3338-55-4  | warm floral herb flower sweet                               | 14.70 | 14.90 | 3 | 4 |   |   | 2 | 2 |
| 16 | 1-Ethyl-1H-pyrrole-2-<br>carbaldehyde | 2167-14-8  | burnt roasted smoky                                         | 14.89 | 15.02 | 2 | 3 |   | 1 | 3 | 1 |
| 17 | (E)-2-Octenal                         | 2548-87-0  | fresh cucumber fatty green herbal<br>banana waxy green leaf | 15.12 | 15.40 | 3 |   |   | 3 | 3 |   |
| 18 | $\gamma$ -Terpinene                   | 99-85-4    | oily woody terpene lemon/lime<br>tropical herbal            | 15.02 | 15.21 | 3 |   |   | 3 | 3 |   |
| 19 | 3-Ethyl-2,5-<br>dimethylpyrazine      | 13360-65-1 | potato cocoa roasted nutty                                  | 15.90 | 16.00 | 1 | 4 |   | 3 |   | 1 |
| 20 | Pyrazine, 2,6-diethyl-                | 13067-27-1 | nutty hazelnut                                              | 16.27 | 16.41 | 4 | 4 | 3 | 4 | 3 |   |
| 21 | Linalool                              | 78-70-6    | citrus floral sweet bois de rose<br>woody green blueberry   | 16.48 | 16.84 | 3 | 4 | 2 | 4 | 3 | 1 |

|    |                                                  |            |                                                                           |       |       |   |   |   |   |   |   |
|----|--------------------------------------------------|------------|---------------------------------------------------------------------------|-------|-------|---|---|---|---|---|---|
| 22 | Nonanal                                          | 124-19-6   | waxy aldehydic rose fresh orris<br>orange peel fatty peely                | 16.43 | 16.78 | 3 | 4 | 2 | 4 | 3 | 1 |
| 23 | Hotrienol                                        | 29957-43-5 | mouldy                                                                    | 16.97 | 17.17 | 3 | 3 |   | 4 | 4 | 2 |
| 24 | 2,6-Dimethyl-1,3,5,7-octatetraene, <i>E, E</i> - | 460-01-5   | Woody, herbal                                                             | 17.76 | 17.88 | 3 | 2 | 2 | 1 | 4 | 2 |
| 25 | 5-Ethyl-6-methyl-3 <i>E</i> -hepten-2-one        | 57283-79-1 | Green, grassy, fresh                                                      | 18.24 | 18.54 | 3 | 2 | 1 | 3 | 4 | 2 |
| 26 | Nerol oxide                                      | 1786-08-9  | green weedy cortex herbal diphenyl<br>oxide narcissus celery              | 18.58 | 18.75 | 3 | 2 | 2 | 4 | 4 | 2 |
| 27 | <i>trans</i> -Linalool oxide (pyranoid)          | 39028-58-5 | Earthy, floral                                                            | 19.23 | 19.46 | 2 | 3 |   | 3 | 4 | 1 |
| 28 | Terpinen-4-ol                                    | 562-74-3   | pepper woody earth musty sweet                                            | 19.47 | 19.72 |   |   | 2 | 3 | 4 | 2 |
| 29 | $\alpha$ -Terpineol                              | 98-55-5    | pine terpene lilac citrus woody floral                                    | 19.80 | 20.04 | 3 |   |   | 3 | 2 | 1 |
| 30 | Methyl salicylate                                | 119-36-8   | wintergreen mint                                                          | 19.93 | 20.22 | 3 | 2 | 3 | 3 | 2 | 1 |
| 31 | ( <i>E, E</i> )-2,4-Nonadienal                   | 5910-87-2  | fatty melon waxy green violet leaf<br>cucumber tropical fruit chicken fat | 20.61 | 20.84 | 2 |   |   | 4 | 2 |   |
| 32 | Nerol                                            | 106-25-2   | sweet natural neroli citrus magnolia                                      | 21.27 | 21.41 |   | 2 | 3 |   |   |   |
| 33 | <i>cis</i> -Citral                               | 106-26-3   | sweet citral lemon peel                                                   | 21.62 | 21.76 | 3 | 3 |   | 4 | 3 | 2 |
| 34 | Geraniol                                         | 106-24-1   | sweet floral fruity rose waxy citrus                                      | 22.01 | 22.49 | 4 | 3 | 2 | 3 |   | 1 |
| 35 | $\gamma$ -Octanolactone                          | 104-50-7   | sweet coconut waxy creamy tonka<br>dairy fatty                            | 22.20 | 22.50 | 2 |   |   | 2 | 2 |   |
| 36 | 2-Phenyl-2-butenal                               | 4411-89-6  | green, vegetative, floral, cocoa and<br>nutty                             | 22.63 | 23.11 | 2 |   |   | 3 | 3 | 1 |
| 37 | 2,4-Decadienal                                   |            | orange sweet fresh citrus fatty green                                     | 23.23 | 23.54 | 3 | 3 |   | 2 | 2 |   |
| 38 | Indole                                           | 120-72-9   | animal floral moth ball fecal<br>naphthelene                              | 23.77 | 24.08 | 3 | 4 | 1 | 2 | 2 | 2 |

|    |                                        |                            |                                                           |       |       |   |   |   |   |   |
|----|----------------------------------------|----------------------------|-----------------------------------------------------------|-------|-------|---|---|---|---|---|
| 39 | Theaspirane B                          | 36431-72-8                 | tea herbal green wet tobacco leaf<br>metallic woody spicy | 24.11 | 24.24 | 2 |   |   | 3 | 2 |
| 40 | (E)-Methyl geranate                    | 1189-09-9                  | waxy green fruity flower                                  | 24.29 | 24.69 | 3 |   |   | 4 | 2 |
| 41 | 1,2-Dihydro-1,1,6-trimethylnaphthalene | 30364-38-6                 | licorice                                                  | 25.46 | 25.60 | 4 | 3 | 1 | 2 |   |
| 42 | $\gamma$ -Nonanolactone                | 104-61-0                   | coconut creamy waxy sweet buttery<br>oily                 | 25.67 | 25.87 | 3 |   | 2 | 3 | 2 |
| 43 | (E)- $\beta$ -Damascenone              | 23726-93-4                 | apple rose honey tobacco sweet                            | 26.12 | 26.50 | 2 | 3 | 2 | 2 | 3 |
| 44 | (Z)-Jasmone                            | 488-10-8                   | woody herbal floral spicy jasmine<br>celery               | 26.69 | 27.11 | 3 | 3 | 2 | 2 | 3 |
| 45 | Dehydrodihydroionone                   | 20483-36-7                 | floral                                                    | 27.46 | 27.67 | 3 | 4 |   | 2 | 3 |
| 46 | $\alpha$ -Ionone                       | 127-41-3                   | sweet woody floral violet orris<br>tropical fruity        | 27.69 | 28.07 | 3 | 4 | 1 | 2 | 4 |
| 47 | Isoeugenol                             | 5932-68-3                  | sweet spicy carnation phenolic floral                     | 28.52 | 28.88 | 3 |   | 1 | 3 | 4 |
| 48 | $\gamma$ -Decanolactone                | 706-14-9                   | fresh oily waxy peach coconut<br>buttery sweet            | 28.99 | 29.19 | 3 |   |   | 2 | 4 |
| 49 | <i>trans</i> - $\beta$ -Ionone         | 79-77-6                    | dry powdery floral woody orris                            | 29.40 | 29.87 | 4 | 4 | 3 | 4 | 3 |
| 50 | <i>cis</i> -Jasmine lactone            | 25524-95-2、<br>100428-67-9 | creamy waxy jasmine peach coconut                         | 29.97 | 30.23 | 3 | 4 | 4 | 4 | 3 |
| 51 | $\delta$ -Dodecalactone                | 705-86-2                   | fresh sweet oily coconut fruity peach<br>creamy dairy     | 29.97 | 30.23 | 3 | 4 | 4 | 4 | 3 |
| 52 | Dihydroactinidioides                   | 15356-74-8                 | ripe apricot red fruit woody                              | 30.76 | 31.08 | 2 | 3 | 4 | 2 | 2 |
| 53 | (E)-Nerolidol                          | 40716-66-3                 | floral green citrus woody waxy                            | 31.70 | 31.90 |   |   |   | 1 | 2 |
| 54 | Hexyl benzoate                         | 6789-88-4                  | fresh balsam sappy clean woody                            | 32.12 | 32.32 | 1 |   | 2 | 1 | 2 |
| 55 | Caryophyllene oxide                    | 1139-30-6                  | sweet fresh dry woody spicy                               | 32.56 | 32.93 | 2 |   |   |   |   |
| 56 | Methyl jasmonate                       | 1211-29-6                  | floral fresh petal magnolia oily waxy                     | 34.16 | 34.32 | 2 |   | 1 |   |   |

|    |                                  |            |                                     |       |       |   |   |   |   |   |   |
|----|----------------------------------|------------|-------------------------------------|-------|-------|---|---|---|---|---|---|
| 57 | $\alpha$ -Cadinol                | 481-34-5   | herb wood                           | 34.38 | 34.70 | 3 | 3 | 4 | 2 | 2 | 2 |
| 58 | Bisabolol oxide B                | 26184-88-3 | Woody, herbal                       | 34.38 | 34.70 | 3 | 3 | 4 | 2 | 2 | 2 |
| 59 | <i>cis</i> -3-Hexenyl salicylate | 65405-77-8 | floral green metallic herbal balsam | 34.95 | 35.25 | 3 | 2 |   | 2 |   | 1 |

RT, retention time. 1-4 represents the intensity of the aroma, 1 indicates the lowest intensity, 4 indicates the highest intensity. P1-P6 represents different evaluator. During the extraction, 1 g tea powder was brewed in 10 mL water (100°C) for GC-O/MS analysis. Qualitative analysis was performed by a combination of NIST14 database comparisons, RI values and olfactive evaluation.

**Table S4.** Detailed information of Lingtong Dancong tea product at medium altitude.

| NO | Odorants                | CAS       | Description                                           | RT (left) | RT (right) | Aroma Intensities (medium altitude) |    |    |    |    |    |
|----|-------------------------|-----------|-------------------------------------------------------|-----------|------------|-------------------------------------|----|----|----|----|----|
|    |                         |           |                                                       |           |            | P1                                  | P2 | P3 | P4 | P5 | P6 |
| 1  | Butanal, 2-methyl-      | 96-17-3   | Musty cocoa coffee nutty                              | 4.22      | 4.41       | 2                                   |    |    | 1  | 1  |    |
| 2  | Hexanal                 | 66-25-1   | fresh green fatty aldehydic grass leafy fruity sweaty | 6.74      | 6.91       | 2                                   | 3  |    | 1  | 2  | 2  |
| 3  | Ethyl 2-methyl butyrate | 7452-79-1 | sharp sweet green apple fruity                        | 8.02      | 8.38       | 3                                   | 3  |    | 1  | 2  |    |
| 4  | 2-Heptanone             | 110-43-0  | fruity spicy sweet herbal coconut woody               | 9.32      | 9.57       |                                     |    |    |    |    |    |
| 5  | Heptanal                | 111-71-7  | fresh aldehydic fatty green herbal wine-lee ozone     | 9.61      | 9.98       | 3                                   | 3  |    | 4  | 2  | 1  |
| 6  | (Z)-4-Heptenal          | 6728-31-0 | fresh aldehydic fatty green herbal wine-lee ozone     | 9.57      | 9.61       | 3                                   | 3  |    | 4  | 2  | 1  |
| 7  | 2,5-Dimethyl pyrazine   | 123-32-0  | peanut butter musty nutty woody roasted cocoa         | 9.92      | 10.18      | 3                                   | 3  |    | 4  | 2  | 1  |
| 8  | Diethyl disulfide       | 110-81-6  | gassy ripe onion greasy garlic                        | 10.40     | 10.76      |                                     | 2  |    | 1  | 1  | 2  |



|    |                                       |            |                                                             |       |       |   |   |   |   |   |   |
|----|---------------------------------------|------------|-------------------------------------------------------------|-------|-------|---|---|---|---|---|---|
| 9  | Dimethyl trisulfide                   | 3658-80-8  | sulfurous cooked onion savory<br>meaty                      | 12.00 | 12.20 | 2 | 2 | 3 | 2 | 3 |   |
| 10 | 1-Octen-3-ol                          | 3391-86-4  | mushroom earthy green oily fungal<br>raw chicken            | 12.20 | 12.40 | 3 |   |   | 2 | 4 |   |
| 11 | Methyl heptenone                      | 110-93-0   | citrus green musty lemongrass apple                         | 12.40 | 12.60 | 3 | 3 | 2 | 4 | 4 | 2 |
| 12 | $\beta$ -Myrcene                      | 123-35-3   | Peppery terpene spicy balsam plastic                        | 12.60 | 12.70 | 3 | 3 | 2 | 4 | 4 | 2 |
| 13 | 2-Pentyl furan                        | 3777-69-3  | Fruity green earthy beany vegetable<br>metallic             | 12.60 | 12.70 | 3 | 3 | 2 | 4 | 4 | 2 |
| 14 | $\alpha$ -Phellandrene                | 99-83-2    | citrus herbal terpene green woody<br>peppery                | 12.98 | 13.21 | 3 | 2 |   | 3 | 2 |   |
| 15 | (Z)- $\beta$ -Ocimene                 | 3338-55-4  | warm floral herb flower sweet                               | 14.71 | 14.86 | 3 | 3 |   | 1 | 2 | 2 |
| 16 | 1-Ethyl-1H-pyrrole-2-<br>carbaldehyde | 2167-14-8  | burnt roasted smoky                                         | 14.89 | 15.02 | 2 |   | 1 | 4 | 3 | 2 |
| 17 | (E)-2-Octenal                         | 2548-87-0  | fresh cucumber fatty green herbal<br>banana waxy green leaf | 15.12 | 15.40 | 3 |   |   | 2 | 4 |   |
| 18 | $\gamma$ -Terpinene                   | 99-85-4    | oily woody terpene lemon/lime<br>tropical herbal            | 15.04 | 15.22 | 3 |   |   | 2 | 4 |   |
| 19 | 3-Ethyl-2,5-<br>dimethylpyrazine      | 13360-65-1 | potato cocoa roasted nutty                                  | 15.90 | 16.00 | 2 | 2 | 1 | 2 |   | 2 |
| 20 | Pyrazine, 2,6-diethyl-                | 13067-27-1 | nutty hazelnut                                              | 16.08 | 16.38 | 3 | 3 | 3 | 3 | 3 |   |
| 21 | Linalool                              | 78-70-6    | citrus floral sweet bois de rose<br>woody green blueberry   | 16.41 | 16.75 | 3 | 4 |   | 3 | 3 | 3 |
| 22 | Nonanal                               | 124-19-6   | waxy aldehydic rose fresh orris<br>orange peel fatty peely  | 16.43 | 16.78 | 3 | 4 |   | 3 | 3 | 3 |
| 23 | Hotrienol                             | 29957-43-5 | mouldy                                                      | 16.85 | 17.05 | 2 |   | 3 | 4 | 4 | 3 |

|    |                                                  |            |                                                                        |       |       |   |   |   |   |   |   |
|----|--------------------------------------------------|------------|------------------------------------------------------------------------|-------|-------|---|---|---|---|---|---|
| 24 | 2,6-Dimethyl-1,3,5,7-octatetraene, <i>E, E</i> - | 460-01-5   | Woody, herbal                                                          | 17.76 | 17.88 | 3 | 2 | 1 | 2 | 4 | 2 |
| 25 | 5-Ethyl-6-methyl-3 <i>E</i> -hepten-2-one        | 57283-79-1 | Green, grassy, fresh                                                   | 18.24 | 18.54 | 2 | 3 |   | 3 | 4 | 1 |
| 26 | Nerol oxide                                      | 1786-08-9  | green weedy cortex herbal diphenyl oxide narcissus celery              | 18.58 | 18.75 | 3 | 4 | 2 | 4 | 4 | 1 |
| 27 | <i>trans</i> -Linalool oxide (pyranoid)          | 39028-58-5 | Earthy, floral                                                         | 19.20 | 19.43 |   | 2 | 2 | 3 | 3 |   |
| 28 | Terpinen-4-ol                                    | 562-74-3   | pepper woody earth musty sweet                                         | 19.49 | 19.65 | 3 | 2 | 2 | 3 | 3 |   |
| 29 | $\alpha$ -Terpineol                              | 98-55-5    | pine terpene lilac citrus woody floral                                 | 19.80 | 20.04 | 2 |   |   | 2 | 2 |   |
| 30 | Methyl salicylate                                | 119-36-8   | wintergreen mint                                                       | 20.13 | 20.25 | 4 | 3 | 2 | 2 | 3 | 1 |
| 31 | ( <i>E, E</i> )-2,4-Nonadienal                   | 5910-87-2  | fatty melon waxy green violet leaf cucumber tropical fruit chicken fat | 20.61 | 20.84 | 3 | 3 |   | 3 | 4 | 2 |
| 32 | Nerol                                            | 106-25-2   | sweet natural neroli citrus magnolia                                   | 21.27 | 21.41 | 2 | 2 |   |   |   | 4 |
| 33 | <i>cis</i> -Citral                               | 106-26-3   | sweet citral lemon peel                                                | 21.62 | 21.88 | 3 | 3 | 3 | 2 | 3 | 1 |
| 34 | Geraniol                                         | 106-24-1   | sweet floral fruity rose waxy citrus                                   | 21.99 | 22.35 | 3 | 2 | 1 | 1 | 3 | 2 |
| 35 | $\gamma$ -Octanolactone                          | 104-50-7   | sweet coconut waxy creamy tonka dairy fatty                            | 22.36 | 22.54 | 2 | 2 |   |   | 3 |   |
| 36 | 2-Phenyl-2-butenal                               | 4411-89-6  | green, vegetative, floral, cocoa and nutty                             | 22.65 | 22.79 | 3 | 2 |   | 1 |   | 1 |
| 37 | 2,4-Decadienal                                   |            | orange sweet fresh citrus fatty green                                  | 23.20 | 23.52 | 2 |   | 1 | 1 |   |   |
| 38 | Indole                                           | 120-72-9   | animal floral moth ball fecal naphthelene                              | 23.80 | 23.96 | 4 | 4 |   | 1 | 2 |   |
| 39 | Theaspirane B                                    | 36431-72-8 | tea herbal green wet tobacco leaf metallic woody spicy                 | 24.13 | 24.23 | 3 | 4 |   | 3 | 3 | 2 |
| 40 | ( <i>E</i> )-Methyl geranate                     | 1189-09-9  | waxy green fruity flower                                               | 24.29 | 24.52 | 4 | 4 |   | 3 | 4 |   |

|    |                                        |                            |                                                    |       |       |   |   |   |   |   |   |
|----|----------------------------------------|----------------------------|----------------------------------------------------|-------|-------|---|---|---|---|---|---|
| 41 | 1,2-Dihydro-1,1,6-trimethylnaphthalene | 30364-38-6                 | licorice                                           | 25.46 | 25.60 | 2 |   | 3 | 1 |   |   |
| 42 | $\gamma$ -Nonanolactone                | 104-61-0                   | coconut creamy waxy sweet buttery oily             | 25.61 | 25.72 | 3 |   | 3 | 1 | 3 |   |
| 43 | ( <i>E</i> )- $\beta$ -Damascenone     | 23726-93-4                 | apple rose honey tobacco sweet                     | 26.32 | 26.54 | 2 | 3 | 2 | 1 | 4 | 1 |
| 44 | ( <i>Z</i> )-Jasmone                   | 488-10-8                   | woody herbal floral spicy jasmine celery           | 26.61 | 27.11 | 2 | 3 | 2 | 1 | 4 |   |
| 45 | Dehydrodihydroionone                   | 20483-36-7                 | floral                                             | 27.33 | 27.68 |   |   | 2 | 2 | 2 |   |
| 46 | $\alpha$ -Ionone                       | 127-41-3                   | sweet woody floral violet orris tropical fruity    | 27.65 | 27.76 | 3 | 4 | 2 | 2 | 4 |   |
| 47 | Isoeugenol                             | 5932-68-3                  | sweet spicy carnation phenolic floral              | 28.46 | 28.61 | 2 | 3 | 2 | 2 | 3 |   |
| 48 | $\gamma$ -Decanolactone                | 706-14-9                   | fresh oily waxy peach coconut buttery sweet        | 28.99 | 29.19 | 2 | 3 | 3 | 1 | 3 |   |
| 49 | <i>trans</i> - $\beta$ -Ionone         | 79-77-6                    | dry powdery floral woody orris                     | 29.37 | 29.68 | 3 | 4 | 2 | 2 | 4 | 2 |
| 50 | <i>cis</i> -Jasmine lactone            | 25524-95-2、<br>100428-67-9 | creamy waxy jasmine peach coconut                  | 29.97 | 30.23 | 2 | 3 | 3 | 1 | 4 |   |
| 51 | $\delta$ -Dodecalactone                | 705-86-2                   | fresh sweet oily coconut fruity peach creamy dairy | 29.97 | 30.23 | 2 | 3 | 3 | 1 | 4 |   |
| 52 | Dihydroactinidioides                   | 15356-74-8                 | ripe apricot red fruit woody                       | 30.76 | 31.10 | 3 | 2 | 2 |   | 4 |   |
| 53 | ( <i>E</i> )-Nerolidol                 | 40716-66-3                 | floral green citrus woody waxy                     | 31.70 | 31.90 |   |   |   |   |   |   |
| 54 | Hexyl benzoate                         | 6789-88-4                  | fresh balsam sappy clean woody                     | 31.94 | 32.11 | 2 | 3 | 1 |   |   |   |
| 55 | Caryophyllene oxide                    | 1139-30-6                  | sweet fresh dry woody spicy                        | 32.56 | 32.93 | 2 | 2 | 1 | 1 | 2 |   |
| 56 | Methyl jasmonate                       | 1211-29-6                  | floral fresh petal magnolia oily waxy              | 34.16 | 34.32 |   |   |   |   |   |   |
| 57 | $\alpha$ -Cadinol                      | 481-34-5                   | herb wood                                          | 34.38 | 34.70 | 3 | 3 | 3 | 2 | 3 | 1 |
| 58 | Bisabolol oxide B                      | 26184-88-3                 | Woody, herbal                                      | 34.38 | 34.70 | 3 | 3 | 3 | 2 | 3 | 1 |
| 59 | <i>cis</i> -3-Hexenyl salicylate       | 65405-77-8                 | floral green metallic herbal balsam                | 34.95 | 35.25 | 3 | 2 |   | 4 |   |   |

RT, retention time. 1-4 represents the intensity of the aroma, 1 indicates the lowest intensity, 4 indicates the highest intensity. P1-P6 represents different evaluator. During the extraction, 1 g tea powder was brewed in 10 mL water (100°C) for GC-O/MS analysis. Qualitative analysis was performed by a combination of NIST14 database comparisons, RI values and olfactive evaluation.

**Table S5.** Detailed information of Lingtou Dancong tea product at low altitude.

| NO | Odorants                | CAS       | Description                                           | RT (left) | RT (right) | Aroma Intensities (low altitude) |    |    |    |    |    |
|----|-------------------------|-----------|-------------------------------------------------------|-----------|------------|----------------------------------|----|----|----|----|----|
|    |                         |           |                                                       |           |            | P1                               | P2 | P3 | P4 | P5 | P6 |
| 1  | Butanal, 2-methyl-      | 96-17-3   | Musty cocoa coffee nutty                              | 4.22      | 4.41       | 1                                | 1  |    | 1  |    |    |
| 2  | Hexanal                 | 66-25-1   | fresh green fatty aldehydic grass leafy fruity sweaty | 6.71      | 6.91       | 1                                | 2  | 1  | 1  |    |    |
| 3  | Ethyl 2-methyl butyrate | 7452-79-1 | sharp sweet green apple fruity                        | 8.02      | 8.38       | 3                                | 2  | 1  | 2  | 1  | 2  |
| 4  | 2-Heptanone             | 110-43-0  | fruity spicy sweet herbal coconut woody               | 9.32      | 9.57       |                                  |    |    |    |    |    |
| 5  | Heptanal                | 111-71-7  | fresh aldehydic fatty green herbal wine-lee ozone     | 9.57      | 9.61       | 3                                | 3  | 4  | 2  |    | 1  |
| 6  | (Z)-4-Heptenal          | 6728-31-0 | fresh aldehydic fatty green herbal wine-lee ozone     | 9.57      | 9.61       | 3                                | 2  | 4  | 2  | 2  | 1  |
| 7  | 2,5-Dimethyl pyrazine   | 123-32-0  | peanut butter musty nutty woody roasted cocoa         | 9.94      | 10.34      | 2                                | 2  | 3  |    |    |    |
| 8  | Diethyl disulfide       | 110-81-6  | gassy ripe onion greasy garlic                        | 10.37     | 10.47      | 2                                |    | 3  |    |    | 3  |
| 9  | Dimethyl trisulfide     | 3658-80-8 | sulfurous cooked onion savory meaty                   | 12.03     | 12.20      | 2                                | 3  | 2  | 3  | 2  | 2  |
| 10 | 1-Octen-3-ol            | 3391-86-4 | mushroom earthy green oily fungal raw chicken         | 12.20     | 12.40      | 3                                |    | 3  | 4  |    | 2  |
| 11 | Methyl heptenone        | 110-93-0  | citrus green musty lemongrass apple                   | 12.40     | 12.60      | 3                                |    | 2  | 4  |    | 3  |

|    |                                          |            |                                                              |       |       |   |   |   |   |   |   |
|----|------------------------------------------|------------|--------------------------------------------------------------|-------|-------|---|---|---|---|---|---|
| 12 | $\beta$ -Myrcene                         | 123-35-3   | Peppery terpene spicy balsam plastic                         | 12.60 | 12.70 | 3 | 3 |   | 4 | 2 |   |
| 13 | 2-Pentyl furan                           | 3777-69-3  | Fruity green earthy beany vegetable<br>metallic              | 12.60 | 12.70 | 3 | 3 |   | 4 | 2 |   |
| 14 | $\alpha$ -Phellandrene                   | 99-83-2    | citrus herbal terpene green woody<br>peppery                 | 12.95 | 13.29 | 3 |   | 3 | 2 |   |   |
| 15 | (Z)- $\beta$ -Ocimene                    | 3338-55-4  | warm floral herb flower sweet                                | 14.68 | 14.84 | 4 | 4 | 3 | 2 |   | 3 |
| 16 | 1-Ethyl-1H-pyrrole-2-carbaldehyde        | 2167-14-8  | burnt roasted smoky                                          | 14.86 | 14.96 | 4 |   | 4 | 4 | 2 | 2 |
| 17 | (E)-2-Octenal                            | 2548-87-0  | fresh cucumber fatty green herbal<br>banana waxy green leaf  | 15.12 | 15.40 | 2 | 4 | 3 | 4 | 3 |   |
| 18 | $\gamma$ -Terpinene                      | 99-85-4    | oily woody terpene lemon/lime<br>tropical herbal             | 15.12 | 15.20 | 2 | 4 | 3 | 4 | 3 |   |
| 19 | 3-Ethyl-2,5-dimethylpyrazine             | 13360-65-1 | potato cocoa roasted nutty                                   | 15.85 | 16.08 | 4 | 4 | 4 |   |   | 3 |
| 20 | Pyrazine, 2,6-diethyl-                   | 13067-27-1 | nutty hazelnut                                               | 16.08 | 16.38 | 2 | 4 | 4 | 4 | 3 |   |
| 21 | Linalool                                 | 78-70-6    | citrus floral sweet / woody green<br>blueberry               | 16.79 | 16.89 | 3 | 3 | 4 | 4 | 2 | 4 |
| 22 | Nonanal                                  | 124-19-6   | waxy aldehydic rose fresh orris<br>orange peel fatty peely   | 16.43 | 16.78 | 2 |   | 3 |   |   | 3 |
| 23 | Hotrienol                                | 29957-43-5 | mouldy                                                       | 17.05 | 17.24 | 2 | 3 |   | 3 | 2 | 4 |
| 24 | 2,6-Dimethyl-1,3,5,7-octatetraene, E, E- | 460-01-5   | Woody, herbal                                                | 17.72 | 17.78 | 3 | 2 | 2 | 4 | 1 | 3 |
| 25 | 5-Ethyl-6-methyl-3E-hepten-2-one         | 57283-79-1 | Green, grassy, fresh                                         | 18.24 | 18.54 | 3 | 3 | 2 | 4 | 1 | 1 |
| 26 | Nerol oxide                              | 1786-08-9  | green weedy cortex herbal diphenyl<br>oxide narcissus celery | 18.58 | 18.75 | 3 | 3 | 4 | 4 | 3 | 3 |

|    |                                            |            |                                                                           |       |       |   |   |   |   |   |   |
|----|--------------------------------------------|------------|---------------------------------------------------------------------------|-------|-------|---|---|---|---|---|---|
| 27 | <i>trans</i> -Linalool oxide<br>(pyranoid) | 39028-58-5 | Earthy, floral                                                            | 19.30 | 19.43 | 2 | 2 | 4 | 4 | 3 | 3 |
| 28 | Terpinen-4-ol                              | 562-74-3   | pepper woody earth musty sweet                                            | 19.49 | 19.65 | 2 | 3 | 4 | 4 |   |   |
| 29 | $\alpha$ -Terpineol                        | 98-55-5    | pine terpene lilac citrus woody floral                                    | 19.79 | 20.09 | 2 | 2 | 3 | 4 |   |   |
| 30 | Methyl salicylate                          | 119-36-8   | wintergreen mint                                                          | 20.13 | 20.38 | 2 |   | 3 | 3 | 1 | 3 |
| 31 | ( <i>E, E</i> )-2,4-Nonadienal             | 5910-87-2  | fatty melon waxy green violet leaf<br>cucumber tropical fruit chicken fat | 20.68 | 20.90 | 3 | 4 | 4 | 4 |   | 2 |
| 32 | Nerol                                      | 106-25-2   | sweet natural neroli citrus magnolia                                      | 21.27 | 21.41 | 2 | 4 | 2 | 2 | 1 | 1 |
| 33 | <i>cis</i> -Citral                         | 106-26-3   | sweet citral lemon peel                                                   | 21.62 | 21.78 | 2 |   | 4 | 3 | 2 | 3 |
| 34 | Geraniol                                   | 106-24-1   | sweet floral fruity rose waxy citrus                                      | 21.99 | 22.35 | 3 | 2 | 2 | 2 | 3 | 3 |
| 35 | $\gamma$ -Octanolactone                    | 104-50-7   | sweet coconut waxy creamy tonka<br>dairy fatty                            | 22.36 | 22.54 | 2 | 3 | 3 | 2 | 3 |   |
| 36 | 2-Phenyl-2-butenal                         | 4411-89-6  | green, vegetative, floral, cocoa and<br>nutty                             | 22.65 | 22.79 | 2 |   | 2 | 3 |   | 3 |
| 37 | 2,4-Decadienal                             |            | orange sweet fresh citrus fatty green                                     | 23.20 | 23.52 | 2 |   | 2 | 4 | 2 |   |
| 38 | Indole                                     | 120-72-9   | animal floral moth ball fecal<br>naphthelene                              | 23.80 | 23.96 | 4 | 4 | 3 | 4 | 2 | 2 |
| 39 | Theaspirane B                              | 36431-72-8 | tea herbal green wet tobacco leaf<br>metallic woody spicy                 | 24.13 | 24.23 | 4 | 3 | 4 | 4 | 2 | 3 |
| 40 | ( <i>E</i> )-Methyl geranate               | 1189-09-9  | waxy green fruity flower                                                  | 24.26 | 24.41 | 2 | 3 | 3 | 3 | 2 | 3 |
| 41 | 1,2-Dihydro-1,1,6-<br>trimethylnaphthalene | 30364-38-6 | licorice                                                                  | 25.07 | 25.42 | 2 | 3 | 2 | 2 |   |   |
| 42 | $\gamma$ -Nonanolactone                    | 104-61-0   | coconut creamy waxy sweet buttery<br>oily                                 | 25.71 | 25.81 | 3 |   | 3 | 3 | 3 |   |
| 43 | ( <i>E</i> )- $\beta$ -Damascenone         | 23726-93-4 | apple rose honey tobacco sweet                                            | 26.24 | 26.49 | 2 | 3 | 3 | 4 | 3 | 3 |

|    |                                  |                            |                                                       |       |       |   |   |   |   |   |   |
|----|----------------------------------|----------------------------|-------------------------------------------------------|-------|-------|---|---|---|---|---|---|
| 44 | (Z)-Jasmone                      | 488-10-8                   | woody herbal floral spicy jasmine<br>celery           | 26.88 | 27.01 | 3 | 3 | 3 | 2 | 2 | 2 |
| 45 | Dehydrodihydroionone             | 20483-36-7                 | floral                                                | 27.48 | 27.64 | 1 | 3 | 3 | 3 | 2 |   |
| 46 | $\alpha$ -Ionone                 | 127-41-3                   | sweet woody floral violet orris<br>tropical fruity    | 27.65 | 27.95 | 2 | 3 | 3 | 4 | 2 | 2 |
| 47 | Isoeugenol                       | 5932-68-3                  | sweet spicy carnation phenolic floral                 | 28.46 | 28.84 | 2 | 2 | 3 | 2 | 3 | 1 |
| 48 | $\gamma$ -Decanolactone          | 706-14-9                   | fresh oily waxy peach coconut<br>buttery sweet        | 28.93 | 29.14 | 3 |   | 3 |   | 3 | 1 |
| 49 | <i>trans</i> - $\beta$ -Ionone   | 79-77-6                    | dry powdery floral woody orris                        | 29.34 | 29.69 | 4 | 4 | 4 | 4 | 2 | 3 |
| 50 | <i>cis</i> -Jasmine lactone      | 25524-95-2,<br>100428-67-9 | creamy waxy jasmine peach coconut                     | 29.79 | 30.06 | 4 | 3 | 4 | 4 | 3 | 1 |
| 51 | $\delta$ -Dodecalactone          | 705-86-2                   | fresh sweet oily coconut fruity peach<br>creamy dairy | 29.97 | 30.23 | 2 | 3 | 1 | 4 | 3 |   |
| 52 | Dihydroactinidioides             | 15356-74-8                 | ripe apricot red fruit woody                          | 30.76 | 31.10 | 3 | 2 |   | 2 |   | 2 |
| 53 | (E)-Nerolidol                    | 40716-66-3                 | floral green citrus woody waxy                        | 31.70 | 31.90 |   |   |   | 2 | 1 |   |
| 54 | Hexyl benzoate                   | 6789-88-4                  | fresh balsam sappy clean woody                        | 32.11 | 32.28 | 2 |   | 1 | 2 | 2 | 2 |
| 55 | Caryophyllene oxide              | 1139-30-6                  | sweet fresh dry woody spicy                           | 32.56 | 32.93 | 2 | 2 |   | 2 | 2 | 1 |
| 56 | Methyl jasmonate                 | 1211-29-6                  | floral fresh petal magnolia oily waxy                 | 34.16 | 34.32 | 2 |   | 2 | 2 |   | 2 |
| 57 | $\alpha$ -Cadinol                | 481-34-5                   | herb wood                                             | 34.38 | 34.70 | 3 | 3 | 3 | 4 | 3 | 4 |
| 58 | Bisabolol oxide B                | 26184-88-3                 | Woody, herbal                                         | 34.38 | 34.70 | 3 | 3 | 3 | 4 | 3 | 4 |
| 59 | <i>cis</i> -3-Hexenyl salicylate | 65405-77-8                 | floral green metallic herbal balsam                   | 34.95 | 35.25 | 2 | 2 | 2 | 3 | 2 | 3 |

RT, retention time. 1-4 represents the intensity of the aroma, 1 indicates the lowest intensity, 4 indicates the highest intensity. P1-P6 represents different evaluator. During the extraction, 1 g tea powder was brewed in 10 mL water (100°C) for GC-O/MS analysis. Qualitative analysis was performed by a combination of NIST14 database comparisons, RI values and olfactive evaluation.

## Reference

1. Wang, M.Q.; Ma, W.J.; Shi, J.; Zhu, Y.; Lin, Z.; Lv, H.P. Characterization of the key aroma compounds in Longjing tea using stir bar sorptive extraction (SBSE) combined with gas chromatography-mass spectrometry (GC-MS), gas chromatography-olfactometry (GC-O), odor activity value (OAV), and aroma recombination. *Food Res. Int.* **2020**, *130*, 108908. <https://doi.org/10.1016/j.foodres.2019.108908>.
2. Zhu, J.C.; Chen, F.; Wang, L.Y.; Niu, Y.W.; Yu, D.; Shu, C.; Chen, H.X.; Wang, H.L.; Xiao, Z.B. Comparison of aroma-active volatiles in oolong tea infusions using GC-Olfactometry, GC-FPD, and GC-MS. *J. Agr. Food Chem.* **2015**, *63*, 7499-7510. <https://doi.org/10.1021/acs.jafc.5b02358>.
3. Chen, X.H.; Chen, D.J.; Hai, J.; Sun, H.Y.; Chen, Z.; Hua, Z.; Li, X.S.; Fei, Y.; Chen, C. Aroma characterization of Hanzhong black tea (*Camellia sinensis*) using solid phase extraction coupled with gas chromatography-mass spectrometry and olfactometry and sensory analysis. *Food Chem.* **2019**, *274*, 130-136. <https://doi.org/10.1016/j.foodchem.2018.08.124>.
4. Wang, S.Q.; Chang, Y.; Liu, B.; Chen, H.T.; Sun, B.G.; Zhang, N. Characterization of the key aroma-active compounds in Yongchuan Douchi (fermented soybean) by application of the sensomics approach. *Molecules* **2021**, *26*, 3048. <https://doi.org/10.3390/molecules26103048>.
5. Zhang, J.L.; Li, J.; Wang, J.; Sun, B.G.; Liu, Y.P.; Huang, M.Q. Characterization of aroma-active compounds in Jasminum sambac concrete by aroma extract dilution analysis and odour activity value. *Flavour Fragr. J.* **2021**, *36*, 197-206. <https://doi.org/10.1002/ffj.3631>.
6. Rychlik, M.; Schieberle, P. W.; Grosch, W. Compilation of odor thresholds, odor qualities and retention indices of key food odorants. Deutsche Forschungsanstalt für Lebensmittelchemie and Institut für Lebensmittelchemie der Technischen Universität München, Garching, Germany, 1998.
7. Qiu, S.; Chen, K.; Liu, C.; Wang, Y.X.; Chen, T.; Yan, G.L.; Li, J.M. Non-saccharomyces yeasts highly contribute to characterisation of flavour profiles in greengage fermentation. *Food Res. Int.* **2022**, *157*, 111391. <https://doi.org/10.1016/j.foodres.2022.111391>.
8. Ma, L.J.; Gao, M.M.; Zhang, L.Q.; Qiao, L.; Li, J.X.; Du, L.P.; Zhang, H.L.; Wang, H. Characterization of the key aroma-active compounds in high-grade Dianhong tea using GC-MS and GC-O combined with sensory-directed flavor analysis. *Food Chem.* **2022**, *378*, 132058. <https://doi.org/10.1016/j.foodchem.2022.132058>.
9. Sanchez-Palomo, E.; Trujillo, M.; Ruiz, A.G.; González Viñas, M.A. Aroma profile of malbec red wines from la mancha region: Chemical and sensory characterization. *Food Res. Int.* **2017**, *100*, 201-208. <https://doi.org/10.1016/j.foodres.2017.06.036>.
10. Guo, X.Y.; Schwab, W.; Ho, C.T.; Song, C.K.; Wan, X.C. Characterization of the aroma profiles of oolong tea made from three tea cultivars by both GC-MS and GC-IMS. *Food Chem.* **2022**, *376*, 131933. <https://doi.org/10.1016/j.foodchem.2021.131933>.
11. Zhai, X.T.; Zhang, L.; Granvogl, M.; Ho, Q.T.; Wan, X.C. Flavor of tea (*Camellia sinensis*): A review on odorants and analytical techniques. *Compr. Rev. Food Sci. F.* **2022**, *21*, 3867-3909. <https://doi.org/10.1111/1541-4337.12999>.
12. Du, X.F.; Finn, C.E.; Qian, M.C. Volatile composition and odour-activity value of thornless 'Black diamond' and 'Marion' blackberries. *Food Chem.* **2010**, *119*, 1127-1134. <https://doi.org/10.1016/j.foodchem.2009.08.024>.
13. Pang, X.L.; Yu, W.S.; Cao, C.D.; Yuan, X.X.; Qiu, J.; Kong, F.Y.; Wu, J.H. Comparison of potent odorants in raw and ripened Pu-Erh tea infusions based on odor activity value calculation and multivariate analysis: understanding the role of pile fermentation. *J. Agric. Food Chem.* **2019**, *67*, 13139-13149 <https://doi.org/10.1021/acs.jafc.9b05321>.
14. Wang, B.; Meng, Q.; Xiao, L.; Li, R.L.; Peng, C.H.; Liao, X.L.; Yan, J.N.; Liu, H.L.; Xie, G.H.; Ho, Q.T., et al. Characterization of aroma compounds of pu-erh ripen tea using solvent assisted flavor evaporation coupled with gas chromatography-mass spectrometry and gas chromatography-olfactometry. *Food Sci. Hum. Well.* **2022**, *11*, 618-626. <https://doi.org/10.1016/j.fshw.2021.12.018>.
